# Supplementary material
Source: Springer Nature journal article supplement (https://www.springermedizin.de/resource/supplementary/13058_2010_9525_MOESM5_ESM.pdf/9702292)

A

2C4: HER1-HER2 heterodimer

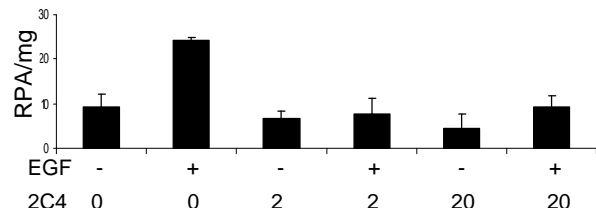

B

Lapatinib: HER1-HER2 heterodimer

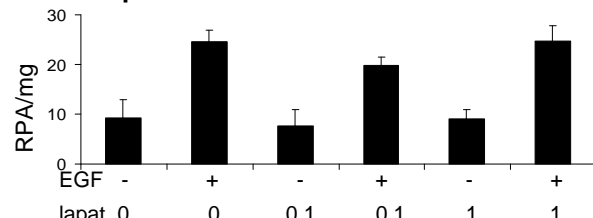

C

Erlotinib: HER1-HER2 heterodimer

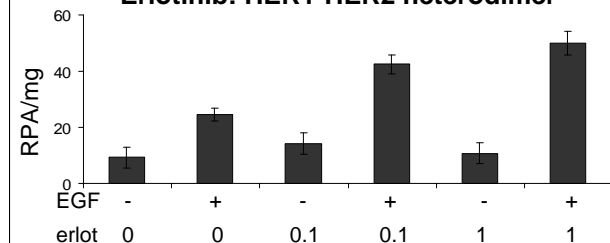

2C4: phospho-HER2

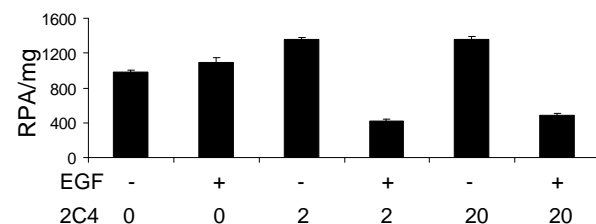

Lapatinib: phospho-HER2

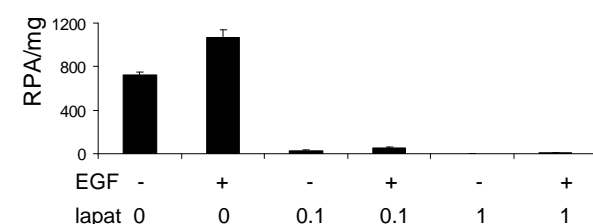

Erlotinib: phospho-HER2

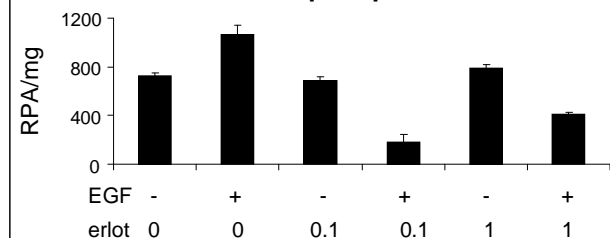

2C4: phospho-HER1

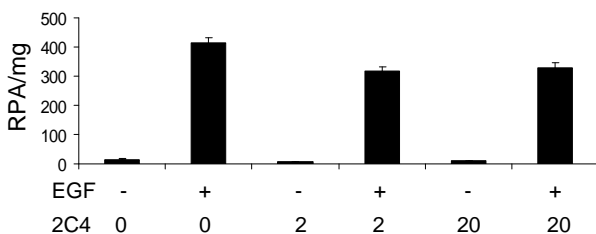

Lapatinib: phospho-HER1

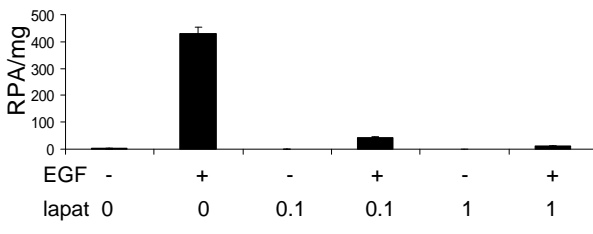

Erlotinib: phospho-HER1

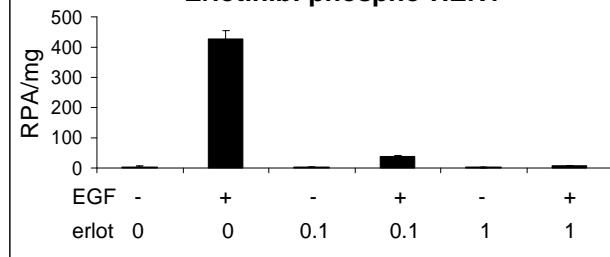

2C4: HER1-HER1 homodimer

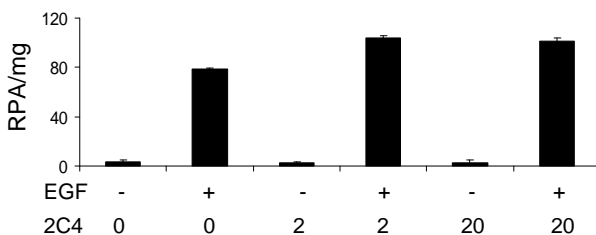

Lapatinib: HER1-HER1 homodimer

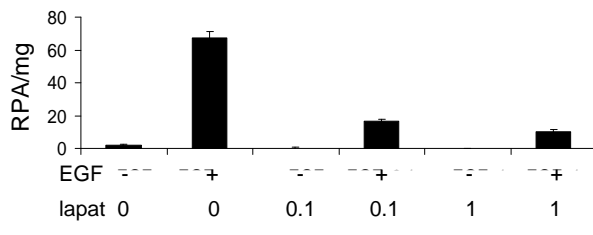

Erlotinib: HER1-HER1 homodimer

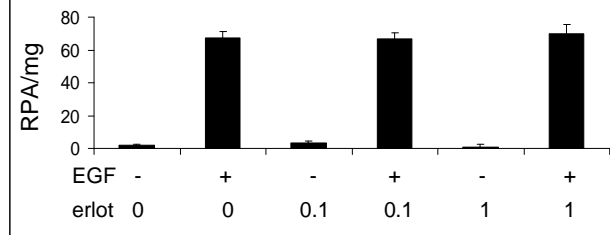

Supplement: MOESM5 [file 9702292]
